# Supplementary material for: A diamondoid net sustained by halogen bonds: employing a cyclobutane to generate a tetrahedral architecture
Source: Royal Society of Chemistry journal article supplement (doi:10.1039/d0ce00627k), 2020-01-01
Supplement: d0ce00627k1.pdf [file d0ce00627k1.pdf]

Supporting Information

for

## **A diamondoid net sustained by halogen bonds: employing a cyclobutane to generate a tetrahedral architecture**

Shalisa M. Oburn, Carlos L. Santana, Elizabeth Elacqua, and Ryan H. Groeneman

Department of Chemistry, The Pennsylvania State University, University Park, PA, 16802, USA.

Department of Biological Sciences, Webster University, St. Louis, MO, 63119, USA

|                                                            |          |
|------------------------------------------------------------|----------|
| 1. Materials, General Methods and Synthesis of the Dia Net | Page 2   |
| 2. Single X-ray Diffraction Information and Data Table     | Page 3-5 |
| 3. Topology Output                                         | Page 6   |
| 4. References                                              | Page 7   |

## 1. Materials, General Methods and Synthesis of the Dia Net

### Materials

Resorcinol (**res**) and *trans*-1,2-bis(4-pyridyl)ethylene (**BPE**) as well as the solvents ethanol, toluene, and chloroform were all purchased from Sigma-Aldrich Chemical (St. Louis, MO, USA) and used as received. The halogen bond donor 1,4-diiodoperchlorobenzene ( $C_6I_2Cl_4$ ) was synthesized by a previous reported method.<sup>1</sup> All crystallization studies were performed in 20 mL scintillation vials.

### General Methods

The photoreactive co-crystal (**res**)·(**BPE**) was prepared by a previously reported method ( $\approx 100$  mg).<sup>2</sup> The resulting solid was then dried and placed between Pyrex glass plates for irradiation. Upon exposure to UV-radiation from a 450 W medium-pressure mercury lamp in an ACE Glass photochemistry cabinet the solid underwent a quantitative [2 + 2] cycloaddition reaction to form *rcctt*-tetrakis(4-pyridyl)cyclobutane, namely 2(**res**)·(**4,4'**-**TPCB**), as previously reported.<sup>2</sup> The **res** template was removed via extraction by adding 20 mL of a 0.10 M sodium hydroxide (NaOH) base along with stirring and heating on a hot plate for 10 minutes. Pure **4,4'**-**TPCB** was realized after 3 washings of 25 mL of chloroform ( $CHCl_3$ ) and subsequent loss of the solvent.

### Synthesis of the Dia Net

The co-crystals (**4,4'**-**TPCB**)·2( $C_6I_2Cl_4$ )·2(**toluene**) (**1**) was synthesized by dissolving 25.0 mg of  $C_6I_2Cl_4$  in 3.0 mL of toluene, which was then combined with a separate warm 1.0 mL ethanol solution of 19.4 mg of **4,4'**-**TPCB** (2:1 molar equivalent). The ethanol solution was heated on a hot plate until the entire solid dissolved. The resulting solution was allowed to cool and slowly evaporate and after 2 days crystals suitable for X-ray diffraction were realized.

## 2. Single X-ray Diffraction Information and Data Table

A suitable crystal was mounted on a MiTeGen cryoloop in random orientations for data collection. Data collections were performed using a Bruker Venture Duo Photon-II single crystal X-Ray diffractometer equipped with an Oxford Cryostream device and operated at 1500 W (50kV, 30 mA) to generate graphite-monochromated Mo K $\alpha$  radiation ( $\lambda = 0.71073 \text{ \AA}$ ). Apex II and SAINT software packages were used for data collection and integration. Data collected were corrected for systematic errors using SADABS based on the Laue symmetry using equivalent reflections. Structure solution and refinement were accomplished using ShelXT<sup>3</sup> and ShelXL<sup>4</sup>, respectively. The structure was solved using direct methods. Toluene molecules disordered over a mirror plane of symmetry were fixed at a 0.5 occupancy and corresponding disordered atoms flanked with Part -1 and Part 0. All non-hydrogen atoms were identified from the difference Fourier map and refined anisotropically. All hydrogen atoms were placed in their calculated positions and were refined using isotropic thermal parameters.

**Table S1.** Crystallographic and refinement data for **1**

|                                         |                                                                               |
|-----------------------------------------|-------------------------------------------------------------------------------|
| CCDC code                               | <b>1996696</b>                                                                |
| Formula                                 | C <sub>50</sub> H <sub>36</sub> Cl <sub>8</sub> I <sub>4</sub> N <sub>4</sub> |
| Formula mass                            | 1484.03                                                                       |
| Temperature                             | 100(2)                                                                        |
| Space group                             | <i>Aba2</i>                                                                   |
| a, $\text{\AA}$                         | 11.0411(4)                                                                    |
| b, $\text{\AA}$                         | 16.8624(7)                                                                    |
| c, $\text{\AA}$                         | 28.2059(7)                                                                    |
| $\alpha$ , $^\circ$                     | 90                                                                            |
| $\beta$ , $^\circ$                      | 90                                                                            |
| $\gamma$ , $^\circ$                     | 90                                                                            |
| volume, $\text{\AA}^3$                  | 5251.4(3)                                                                     |
| Z                                       | 4                                                                             |
| Density (calculated), g/cm <sup>3</sup> | 1.877                                                                         |
| $\mu$ , mm <sup>-1</sup>                | 2.820                                                                         |
| Scan                                    | $\omega$ scan                                                                 |

---

|                                       |                                  |
|---------------------------------------|----------------------------------|
| $\theta$ range for data collection, ° | 4.64-56.574                      |
| Reflections measured                  | 55382                            |
| Independent observed reflections      | 6505                             |
| Data/restraints/parameters            | 6505/133/309                     |
| $R_{\text{int}}$                      | 0.0309                           |
| Final R Indices [ $I > 2\sigma$ ]     | $R_1 = 0.0140$<br>$wR2 = 0.0320$ |
| R Indices (all data)                  | $R_1 = 0.0140$<br>$wR2 = 0.0323$ |
| Goodness-of-fit on $F^2$              | 1.040                            |

---

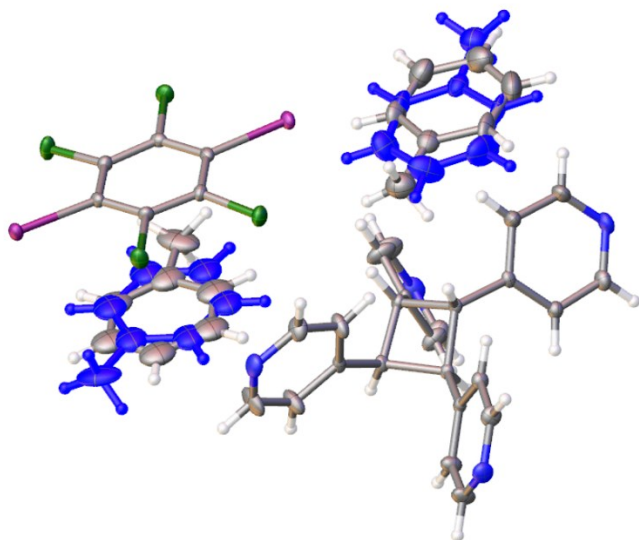

**Figure S1.** ORTEP with thermal ellipsoids set at 50 % probability for **1**. Toluene molecules disordered over a symmetry element shown in blue.

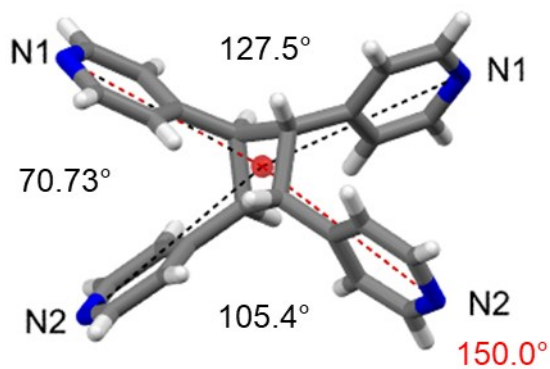

**Figure S2.** Corresponding geometries between 1,2-*cis* (black, 70.73°), 1,4-*trans* (black, 127.5° and 105.4°), and 1,3-*trans* (red, 150.0°) 4-pyridyl groups. Measurements are recorded from the centroid of the cyclobutane ring of **4,4'-TPCB** (red sphere) to corresponding N-atom halogen-bond acceptors.

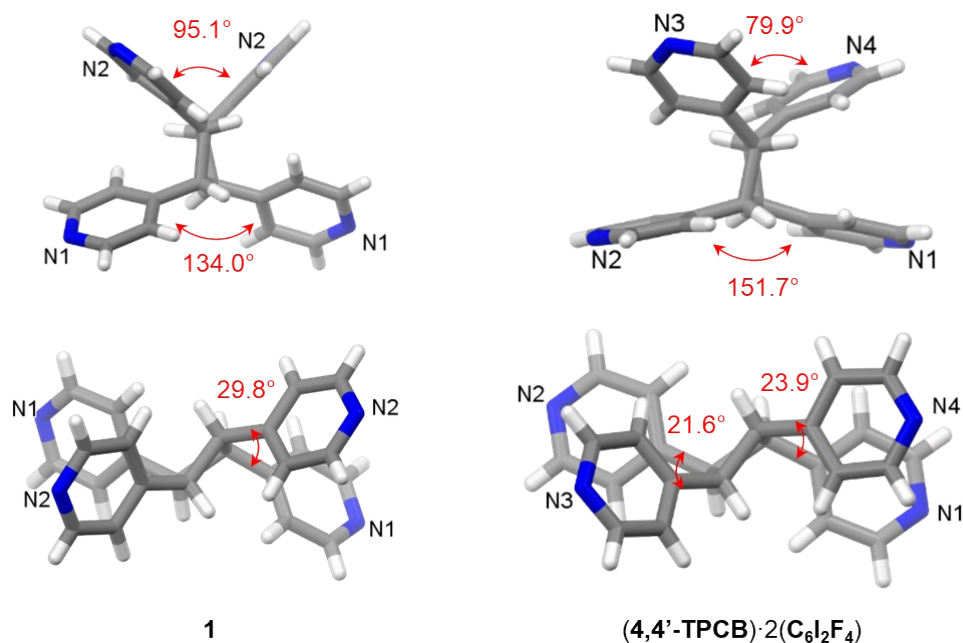

**Figure S3.** Dihedral angles between gauche *trans*-pyridyl (top) and *cis*-pyridyl groups (bottom) of 4,4'-TPCB of the **dia** net of **1** (left) compared to the **sql** net of  $(4,4'\text{-TPCB})\cdot 2(\text{C}_6\text{I}_2\text{F}_4)$  (right). Dihedral angles determined in reference to pairs of C-C bonds within the cyclobutane covalently connected to corresponding 4-pyridyl group.

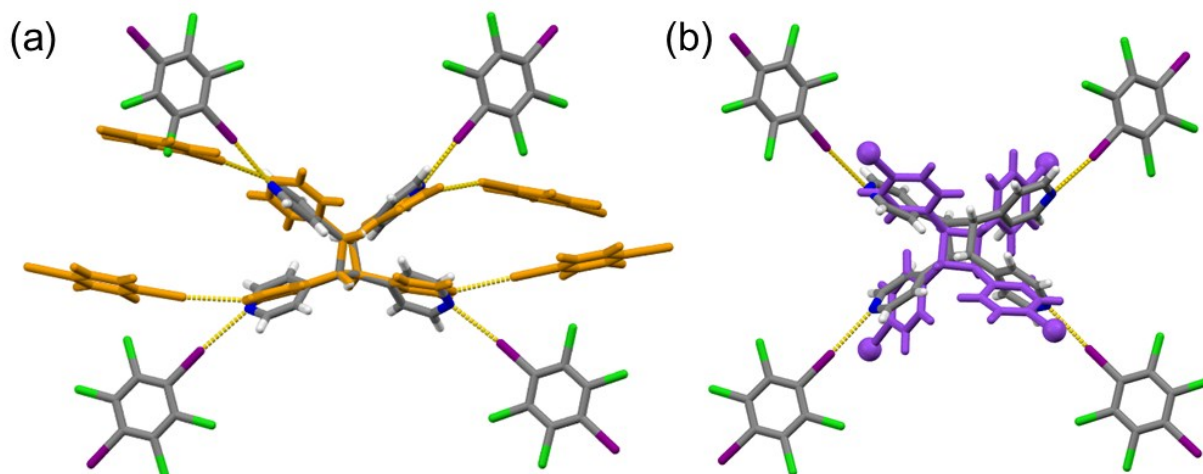

**Figure S4.** Overlay views comparing: (a) the **dia** net of **1** (full element colors) compared to the **sql** net of  $(4,4'\text{-TPCB})\cdot 2(\text{C}_6\text{I}_2\text{F}_4)$  (orange) and (b) 3D nets constructed from the *rctt*-4,4'-TPCB of **1** (full element colors) compared to *rtct*-4,4'-TPCB (purple) of  $[\text{CoF}_2(\text{rtct}\text{-}4,4'\text{-TPCB})]\cdot 5\text{H}_2\text{O}$  with Co(II) metal centers shown as spheres.<sup>5</sup>

### 3. Topology Output

ToposPro calculations:

A net simplification of **1** was performed using ToposPro software.<sup>6</sup> The *Auto CN*<sup>7</sup> and *ADS*<sup>8,9</sup> commands upon choosing **4,4'-TPCB** as nodes provided a simplified net with 6<sup>6</sup> **dia** topology. ToposPro also indicated **dia** net related by inversion centers (-1). The following includes part of the ToposPro output, where ZA1 represents the center **4,4'-TPCB**:

Atom ZA1 links by bridge ligands and has

| Common vertex with                           | R(A-A) |  |  |  |  |  |
|----------------------------------------------|--------|--|--|--|--|--|
| ZA 1 -0.5000 -0.5000 0.7609 (-1-1 0) 22.665A | 1      |  |  |  |  |  |
| ZA 1 0.5000 1.5000 0.7609 (0 1 0) 22.665A    | 1      |  |  |  |  |  |
| ZA 1 0.5000 -0.5000 -0.2391 (0-1-1) 22.665A  | 1      |  |  |  |  |  |
| ZA 1 -0.5000 1.5000 -0.2391 (-1 1-1) 22.665A | 1      |  |  |  |  |  |

-----  
Structural group No 1  
-----

Structure consists of 3D framework with ZA

There are 8 interpenetrating nets

FIV: Full interpenetration vectors  
-----

[0,1/2,1/2] (16.43A)

[0,1/2,-1/2] (16.43A)  
-----

PIC: [0,4,-4][1,0,1][0,2,-1] (PICVR=8)

Zt=8; Zn=1

Class Ia Z=8

Coordination sequences  
-----

ZA1: 1 2 3 4 5 6 7 8 9 10

Num 4 12 24 42 64 92 124 162 204 252

Cum 5 17 41 83 147 239 363 525 729 981  
-----

TD10=981

Vertex symbols for selected sublattice  
-----

ZA1 Point symbol: {6<sup>6</sup>}

Extended point symbol:[6(2).6(2).6(2).6(2).6(2).6(2)]  
-----

Point symbol for net: {6<sup>6</sup>}

4-c net; uninodal net

Topological type: dia Diamond; 4/6/c1; sqc6 (topos&RCSR.ttd) {6<sup>6</sup>} - VS

[6(2).6(2).6(2).6(2).6(2).6(2)] (76520 types in 11 databases)

#### 4. References

1. Reddy, C. M.; Kirchner, M. T.; Gundakaram, R. C.; Padmanabhan, K. A.; Desiraju, G. R. *Chem. Eur. J.* **2006**, *12*, 2222.
2. MacGillivray, L. R.; Reid, J. L.; Ripmeester, J. A. *J. Am. Chem. Soc.*, **2000**, *122*, 7817.
3. Sheldrick, G. *Acta Crystallogr. Sect. A*, **2015**, *71*, 3.
4. Sheldrick, G. *Acta Crystallogr. Sect. C*, **2015**, *71*, 3.
5. A. M. P. Peedikakkal, C. S. Y. Peh, L. L. Koh, and J. J. Vittal, *Inorg. Chem.*, **2010**, *49*, 6775.
6. Blatov V. A., Shevchenko A. P., Proserpio D. M. *Cryst. Growth Des.*, **2014**, *14*, 3576.
7. Blatov V. A. *Struct. Chem.*, **2016**, *27*, 1605.
8. Alexandrov E. V., Blatov V. A., Kochetkov A. V., Proserpio D. M. *CrystEngComm*, **2011**, *13*, 3947.
9. Blatov V.A., O’Keeffe M., Proserpio D. M. *CrystEngComm*, **2010**, *12*, 44.
